# Supplementary material
Source: publisher figshare collection journal article supplement (https://f1000.figshare.com/ndownloader/files/1954128)
Supplement: Supplementary file 1 [file 1954128]

,Time (min),Cross section,Corrected (%)
-ATP; -LytS,0,9.3,0
"-ATP, +LytS",5,53.4,44.1
"-ATP, +LytS",15,63.7,54.4
"-ATP, +LytS",30,75,65.8
"+ATP, +LytS",5,64,54.8
"+ATP, +LytS",15,69.6,60.4
"+ATP, +LytS",30,79.9,70.6
,,,
no LytS,0,8.5,0
no LytS,5,14.5,10.4
no LytS,15,24.1,26.6
no LytS,30,30.7,37.9
